# Supplementary material for: A “turn-on” Cr3+ ion probe based on non-luminescent metal–organic framework-new strategy to prepare a recovery probe
Source: Royal Society of Chemistry journal article supplement (doi:10.1039/d1ta00062d), 2021-01-01
Supplement: d1ta00062d1.pdf [file d1ta00062d1.pdf]

## **Electronic Supporting Information**

**A “turn-on” Cr<sup>3+</sup> ion probe based on non-luminescent metal-organic framework—New strategy to prepare recovery probe**

## Experimental Procedures

### Materials and physical measurements

All commercially available reagents and solvents were used as received without further purification. H<sub>2</sub>L was synthesized according to reported methods.<sup>1</sup> Infrared spectra (IR) were recorded on Nicolet-20DXB spectrometer as KBr pellets in the range of 4000–400 cm<sup>-1</sup>. The UV-visible absorption spectra were collected on a Hitachi U-3900 spectrophotometer. Thermogravimetric analyses (TGA) were performed under nitrogen atmosphere with a heating rate of 10 °C/min using a TA-Q50 thermogravimetric analyzer. Elemental analyses of C, H, and N were determined on a Vario EL III elemental analyzer, while Cr was determined on a Perkinelmer OPTIMA 2000DV inductively coupled plasma emission spectrometer. Powder X-ray diffraction patterns (PXRD) data were collected on a Rigaku SmartLab 9KW X-ray diffractometer. Luminescent spectra were acquired at ambient temperature by using a Hitachi F-7000 fluorescence spectrophotometer. The fluorescence lifetime were measured on a FLS1000 spectrophotometer (Edinburgh Instruments). A nanosecond pulsed diode laser with the excitation wavelength at 380 nm (EPL-380) was used for the measurements. Photoluminescence graphs were taken using a Canon camera (ixus 230 HS) under UV lamp irradiation.

### Synthesis of [Eu<sub>2</sub>L<sub>3</sub>(DMF)<sub>3</sub>] $\cdot$ 2DMF $\cdot$ 5H<sub>2</sub>O (**1**)

A mixture containing H<sub>2</sub>L (0.11 mmol, 40 mg) and Eu(NO<sub>3</sub>)<sub>3</sub> $\cdot$ 6H<sub>2</sub>O (0.22 mmol, 98 mg) in DMF/H<sub>2</sub>O (2 mL/1 mL) in a 20 mL scintillation vial was heated at 115 °C for 2 d and then cooled to room temperature. The brown crystals were collected, washed with DMF and dried in air (42% yield). Element analysis (%) calcd for C<sub>84</sub>H<sub>90</sub>Eu<sub>2</sub>N<sub>8</sub>O<sub>22</sub>: C, 54.02; H, 4.86; N, 5.99. Found: C, 54.19; H, 4.75; N, 5.68. IR (cm<sup>-1</sup>): 3451(s), 3059(m), 1735(w), 1701(w), 1654(s), 1584(s), 1437(s), 1382(s), 782(m), 731(m), 707(w).

### Synthesis of 0.03Cr(NO<sub>3</sub>)<sub>3</sub> $\cdot$ [Eu<sub>2</sub>L<sub>3</sub>(H<sub>2</sub>O)(DMF)<sub>2</sub>] $\cdot$ 2DMF $\cdot$ 10H<sub>2</sub>O (Cr(NO<sub>3</sub>)<sub>3</sub>@**1'**)

The compound was obtained by soaking the crystals of **1** in an aqueous solution of Cr(NO<sub>3</sub>)<sub>3</sub> (0.01M) at room temperature for 24 h. The resulted crystals were collected by filtration, washed with H<sub>2</sub>O and dried in air. Element analysis (%) calcd for C<sub>81</sub>H<sub>95</sub>Cr<sub>0.03</sub>Eu<sub>2</sub>N<sub>7.09</sub>O<sub>27.27</sub>: C, 50.94; H, 5.01; N, 5.20, Cr, 0.082. Found: C, 50.49; H, 5.05; N, 5.19; Cr, 0.083. IR (cm<sup>-1</sup>): 3401(s), 1735(w), 1701(w), 1655(s), 1605(s), 1441(s), 1379(s), 785(m), 732(m), 667(w).

### X-ray crystallographic study

Intensity data of single crystals was measured at 296(2) K on a Bruker SMART APEX II CCD area detector system. Data were corrected for absorption effects using the multi-scan technique (SADABS). The structure was solved by direct methods using SHELXS-2014 and was refined by full-matrix least squares methods using SHELXS-2014.<sup>2</sup> The hydrogen atoms were included in the structural model as fixed atoms "riding" on their respective carbon atoms using the idealized sp<sup>2</sup>-hybridized geometry and C–H bond lengths of 0.95 Å. Since the disordered DMF and H<sub>2</sub>O solvent molecules could not be unambiguously modelled, the PLATON/SQUEEZE<sup>3</sup> program was utilized to calculate the solvent disorder area and remove

its contribution to the overall intensity data. The residual electron densities amounted to 130 e per formula, which roughly correspond to 2 DMF and 5 H<sub>2</sub>O molecules for **1**, and 173 e per formula, which roughly correspond to 2 DMF and 10 H<sub>2</sub>O molecules for Cr(NO<sub>3</sub>)<sub>3</sub>@**1**'. A summary of the most important crystal and structure refinement data is given in **Table S1**. Selected bond distances and angles are given in **Table S2** and **S3**. CCDC 2053671-2053672 contain the supplementary crystallographic data for this paper. The data can be obtained free of charge via [www.ccdc.cam.ac.uk/conts/retrieving.html](http://www.ccdc.cam.ac.uk/conts/retrieving.html) (or from the Cambridge Crystallographic Data Centre, 12 Union Road, Cambridge CB2 1EZ, UK; fax: (+44) 1223-336-033; or e-mail: [deposit@ccdc.cam.ac.uk](mailto:deposit@ccdc.cam.ac.uk)).

### **Luminescence sensing of ions in dispersions**

Each sensing was repeated at least three times with consistent results. The excitation slit width and emission slit width in luminescent measurements were set to be 5 nm and 5 nm, respectively. Each time 1.5 mg finely-ground powders of **1** were dispersed in 3mL aqueous solution, stirred for 8 hours to form a stable emulsion for the luminescent studies. The titrations were carried out by gradually adding Cr(NO<sub>3</sub>)<sub>3</sub> solutions (0.1M) into suspensions of **1**.

### **Hirshfeld surface analysis**

The intermolecular interactions present in **1** and Cr(NO<sub>3</sub>)<sub>3</sub>@**1**' were investigated through Hirshfeld surface analysis by using CrystalExplorer 17.5 program.<sup>4-6</sup> By allocating the space in the crystal to the area where the electron density ratio (molecule) of the sum of spherical atoms in the molecule is equal to 0.5, the Hirshfeld surface of the molecule in the crystal is constructed. *de* and *di* are defined as the distance from the Hirshfeld surface to the nearest nucleus outside and inside the mean surface, respectively. *dnorm* is the sum of *de* and *di* normalized by van der Waals radius (*r*<sup>vdw</sup>). When the intermolecular contacts are closer, around and longer than the sum of their van der Waals radii, they are highlighted on the surface of Hirshfeld *dnorm* in red, white and blue, respectively. A 2D fingerprint is generated by plotting the distribution of points derived from the Hirshfeld surface, which is used to summarize the interaction between molecules.<sup>7</sup> Each point on the 2D fingerprint map corresponds to a specific (*de*, *di*) coordinate, and the color of each point corresponds to the relative area of the surface with the (*de*, *di*). Points with small, medium, and large contribution to the surface contribution to the surface are colored from blue, through green to red.

## Supporting Tables

**Table S1.** Crystallographic data for complex **1** and Cr(NO<sub>3</sub>)<sub>3</sub>@**1**'.

|                                                                                      | <b>1</b>                                                                       | Cr(NO <sub>3</sub> ) <sub>3</sub> @ <b>1</b> '                                                          |
|--------------------------------------------------------------------------------------|--------------------------------------------------------------------------------|---------------------------------------------------------------------------------------------------------|
| Formula                                                                              | C <sub>84</sub> H <sub>90</sub> Eu <sub>2</sub> N <sub>8</sub> O <sub>22</sub> | C <sub>81</sub> H <sub>95</sub> Cr <sub>0.03</sub> Eu <sub>2</sub> N <sub>7.09</sub> O <sub>27.27</sub> |
| Formula weight                                                                       | 1867.58                                                                        | 1909.72                                                                                                 |
| Crystal system                                                                       | Triclinic                                                                      | Triclinic                                                                                               |
| Space group                                                                          | P-1                                                                            | P-1                                                                                                     |
| <i>a</i> (Å)                                                                         | 16.0028(6)                                                                     | 16.1166(10)                                                                                             |
| <i>b</i> (Å)                                                                         | 16.4106(6)                                                                     | 16.1947(12)                                                                                             |
| <i>c</i> (Å)                                                                         | 17.9636(7)                                                                     | 17.9395(11)                                                                                             |
| $\alpha$ (°)                                                                         | 92.970(1)                                                                      | 93.188(2)                                                                                               |
| $\beta$ (°)                                                                          | 110.088(2)                                                                     | 109.729(2)                                                                                              |
| $\gamma$ (°)                                                                         | 110.910(2)                                                                     | 111.604(2)                                                                                              |
| <i>V</i> (Å <sup>3</sup> )/ <i>Z</i>                                                 | 4056.2(3)/2                                                                    | 4010.3(5)/2                                                                                             |
| <i>D</i> <sub>calcd</sub> (g/cm <sup>3</sup> )                                       | 1.336                                                                          | 1.305                                                                                                   |
| $\mu$ (mm <sup>-1</sup> )                                                            | 1.595                                                                          | 1.610                                                                                                   |
| <i>F</i> (000)                                                                       | 1644                                                                           | 1584                                                                                                    |
| $\theta$ range(°)                                                                    | 2.005 -25.000                                                                  | 2.786-25.000                                                                                            |
| Reflections collected / unique                                                       | 68880/14160                                                                    | 59901 / 14074                                                                                           |
| <i>R</i> (int)                                                                       | 0.0243                                                                         | 0.0316                                                                                                  |
| GOF on <i>F</i> <sup>2</sup>                                                         | 1.101                                                                          | 1.051                                                                                                   |
| <i>R</i> <sub><i>I</i></sub> <sup>a</sup> , <i>I</i> > 2 $\sigma$ ( <i>I</i> ) (all) | 0.0611 (0.0700)                                                                | 0.0458 (0.0576)                                                                                         |
| <i>wR</i> <sub>2</sub> <sup>b</sup> , <i>I</i> > 2 $\sigma$ ( <i>I</i> ) (all)       | 0.1703 (0.1814)                                                                | 0.1298 (0.1422)                                                                                         |
| Max/mean shift in final cycle                                                        | 0.001/0.000                                                                    | 0.001/0.000                                                                                             |

<sup>a</sup> $R = \sum(|F_o| - |F_c|) / \sum|F_o|$ , <sup>b</sup> $R_w = \{ \sum w[(F_o^2 - F_c^2)] / \sum w[(F_o^2)^2] \}^{0.5}$ ,  $w = [\sigma^2(F_o) + (aP)^2 + bP]^{-1}$ , where  $P = (F_o^2 + 2F_c^2)/3$ . **1**,  $a = 0.1048$ ,  $b = 26.4003$ . Cr(NO<sub>3</sub>)<sub>3</sub>@**1**',  $a = 0.0865$ ,  $b = 13.3181$ .

**Table S2.** Bond lengths (Å) and angles (°) for **1**.

|                     |           |                     |            |
|---------------------|-----------|---------------------|------------|
| Eu(1)-O(15)         | 2.374(6)  | Eu(2)-O(13)         | 2.398(5)   |
| Eu(1)-O(14)         | 2.378(7)  | Eu(2)-O(5)          | 2.414(5)   |
| Eu(1)-O(10)         | 2.382(4)  | Eu(2)-O(7)#2        | 2.417(4)   |
| Eu(1)-O(11)#1       | 2.427(5)  | Eu(2)-O(4)#3        | 2.444(4)   |
| Eu(1)-O(8)#2        | 2.435(5)  | Eu(2)-O(1)          | 2.456(4)   |
| Eu(1)-O(12)#1       | 2.456(5)  | Eu(2)-O(3)#3        | 2.459(5)   |
| Eu(1)-O(2)          | 2.486(5)  | Eu(2)-O(9)          | 2.468(5)   |
| Eu(1)-O(1)          | 2.511(4)  | Eu(2)-O(6)          | 2.473(5)   |
| Eu(1)-O(7)#2        | 2.704(5)  | Eu(2)-O(10)         | 2.647(4)   |
| O(15)-Eu(1)-O(14)   | 84.3(3)   | O(13)-Eu(2)-O(5)    | 100.2(2)   |
| O(15)-Eu(1)-O(10)   | 83.8(2)   | O(13)-Eu(2)-O(7)#2  | 80.53(18)  |
| O(14)-Eu(1)-O(10)   | 158.6(2)  | O(5)-Eu(2)-O(7)#2   | 132.98(16) |
| O(15)-Eu(1)-O(11)#1 | 75.3(2)   | O(13)-Eu(2)-O(4)#3  | 126.37(17) |
| O(14)-Eu(1)-O(11)#1 | 77.1(2)   | O(5)-Eu(2)-O(4)#3   | 76.65(17)  |
| O(10)-Eu(1)-O(11)#1 | 82.66(17) | O(7)#2-Eu(2)-O(4)#3 | 139.73(16) |

|                       |            |                     |            |
|-----------------------|------------|---------------------|------------|
| O(15)-Eu(1)-O(8)#2    | 74.8(3)    | O(13)-Eu(2)-O(1)    | 80.24(17)  |
| O(14)-Eu(1)-O(8)#2    | 76.8(2)    | O(5)-Eu(2)-O(1)     | 152.82(15) |
| O(10)-Eu(1)-O(8)#2    | 116.85(16) | O(7)#2-Eu(2)-O(1)   | 74.13(15)  |
| O(11)#1-Eu(1)-O(8)#2  | 141.8(2)   | O(4)#3-Eu(2)-O(1)   | 81.33(16)  |
| O(15)-Eu(1)-O(12)#1   | 128.3(2)   | O(13)-Eu(2)-O(3)#3  | 73.95(17)  |
| O(14)-Eu(1)-O(12)#1   | 80.3(2)    | O(5)-Eu(2)-O(3)#3   | 75.05(17)  |
| O(10)-Eu(1)-O(12)#1   | 93.25(17)  | O(7)#2-Eu(2)-O(3)#3 | 145.60(16) |
| O(11)#1-Eu(1)-O(12)#1 | 53.18(16)  | O(4)#3-Eu(2)-O(3)#3 | 53.22(16)  |
| O(8)#2-Eu(1)-O(12)#1  | 145.43(19) | O(1)-Eu(2)-O(3)#3   | 79.07(16)  |
| O(15)-Eu(1)-O(2)      | 145.8(2)   | O(13)-Eu(2)-O(9)    | 149.67(18) |
| O(14)-Eu(1)-O(2)      | 77.6(2)    | O(5)-Eu(2)-O(9)     | 76.18(18)  |
| O(10)-Eu(1)-O(2)      | 121.14(15) | O(7)#2-Eu(2)-O(9)   | 80.62(17)  |
| O(11)#1-Eu(1)-O(2)    | 126.89(18) | O(4)#3-Eu(2)-O(9)   | 82.67(17)  |
| O(8)#2-Eu(1)-O(2)     | 73.0(2)    | O(1)-Eu(2)-O(9)     | 116.75(15) |
| O(12)#1-Eu(1)-O(2)    | 77.00(18)  | O(3)#3-Eu(2)-O(9)   | 131.56(16) |
| O(15)-Eu(1)-O(1)      | 142.7(2)   | O(13)-Eu(2)-O(6)    | 79.13(18)  |
| O(14)-Eu(1)-O(1)      | 128.6(2)   | O(5)-Eu(2)-O(6)     | 53.51(15)  |
| O(10)-Eu(1)-O(1)      | 69.29(14)  | O(7)#2-Eu(2)-O(6)   | 81.19(15)  |
| O(11)#1-Eu(1)-O(1)    | 123.72(16) | O(4)#3-Eu(2)-O(6)   | 128.58(16) |
| O(8)#2-Eu(1)-O(1)     | 94.4(2)    | O(1)-Eu(2)-O(6)     | 150.02(14) |
| O(12)#1-Eu(1)-O(1)    | 80.06(15)  | O(3)#3-Eu(2)-O(6)   | 115.31(17) |
| O(2)-Eu(1)-O(1)       | 51.87(15)  | O(9)-Eu(2)-O(6)     | 74.66(17)  |
| O(15)-Eu(1)-O(7)#2    | 77.7(2)    | O(13)-Eu(2)-O(10)   | 138.50(17) |
| O(14)-Eu(1)-O(7)#2    | 126.8(2)   | O(5)-Eu(2)-O(10)    | 120.93(17) |
| O(10)-Eu(1)-O(7)#2    | 67.42(14)  | O(7)#2-Eu(2)-O(10)  | 67.92(14)  |
| O(11)#1-Eu(1)-O(7)#2  | 141.48(16) | O(4)#3-Eu(2)-O(10)  | 73.10(15)  |
| O(8)#2-Eu(1)-O(7)#2   | 50.33(16)  | O(1)-Eu(2)-O(10)    | 65.99(14)  |
| O(12)#1-Eu(1)-O(7)#2  | 147.13(16) | O(3)#3-Eu(2)-O(10)  | 119.41(15) |
| O(2)-Eu(1)-O(7)#2     | 90.26(17)  | O(9)-Eu(2)-O(10)    | 50.79(14)  |
| O(1)-Eu(1)-O(7)#2     | 68.46(14)  | O(6)-Eu(2)-O(10)    | 119.69(16) |
| Eu(2)-O(1)-Eu(1)      | 100.45(15) | Eu(1)-O(10)-Eu(2)   | 98.62(14)  |
| Eu(2)#2-O(7)-Eu(1)#2  | 96.25(15)  |                     |            |

**Symmetry transformations used to generate equivalent atoms:**

#1: -x, -y, -z+1; #2: -x+1, -y+1, -z+1; #3: -x, -y+1, -z+1.

**Table S3.** Selected bond lengths (Å) and angles (°) for Cr(NO<sub>3</sub>)<sub>3</sub>@1'.

|                  |            |                   |            |
|------------------|------------|-------------------|------------|
| Eu(1)-O(13)      | 2.377(4)   | Eu(2)-O(14)       | 2.343(5)   |
| Eu(1)-O(5)       | 2.408(4)   | Eu(2)-O(10)       | 2.382(4)   |
| Eu(1)-O(7)#1     | 2.439(4)   | Eu(2)-O(15)       | 2.411(5)   |
| Eu(1)-O(1)       | 2.440(4)   | Eu(2)-O(11)#3     | 2.428(4)   |
| Eu(1)-O(4)#2     | 2.454(4)   | Eu(2)-O(8)#1      | 2.430(4)   |
| Eu(1)-O(3)#2     | 2.458(4)   | Eu(2)-O(12)#3     | 2.450(4)   |
| Eu(1)-O(9)       | 2.466(4)   | Eu(2)-O(2)        | 2.476(4)   |
| Eu(1)-O(6)       | 2.487(4)   | Eu(2)-O(1)        | 2.516(4)   |
| Eu(1)-O(10)      | 2.611(4)   | Eu(2)-O(7)#1      | 2.645(4)   |
| O(13)-Eu(1)-O(5) | 100.48(17) | O(14)-Eu(2)-O(10) | 157.31(18) |

|                      |            |                       |            |
|----------------------|------------|-----------------------|------------|
| O(13)-Eu(1)-O(7)#1   | 81.45(15)  | O(14)-Eu(2)-O(15)     | 85.8(2)    |
| O(5)-Eu(1)-O(7)#1    | 134.20(13) | O(10)-Eu(2)-O(15)     | 80.68(16)  |
| O(13)-Eu(1)-O(1)     | 81.82(14)  | O(14)-Eu(2)-O(11)#3   | 75.62(18)  |
| O(5)-Eu(1)-O(1)      | 152.47(13) | O(10)-Eu(2)-O(11)#3   | 83.16(14)  |
| O(7)#1-Eu(1)-O(1)    | 73.32(13)  | O(15)-Eu(2)-O(11)#3   | 74.12(16)  |
| O(13)-Eu(1)-O(4)#2   | 126.63(14) | O(14)-Eu(2)-O(8)#1    | 76.22(17)  |
| O(5)-Eu(1)-O(4)#2    | 76.87(13)  | O(10)-Eu(2)-O(8)#1    | 117.16(13) |
| O(7)#1-Eu(1)-O(4)#2  | 137.68(13) | O(15)-Eu(2)-O(8)#1    | 75.20(19)  |
| O(1)-Eu(1)-O(4)#2    | 79.87(13)  | O(11)#3-Eu(2)-O(8)#1  | 139.39(17) |
| O(13)-Eu(1)-O(3)#2   | 74.22(14)  | O(14)-Eu(2)-O(12)#3   | 80.01(18)  |
| O(5)-Eu(1)-O(3)#2    | 75.35(14)  | O(10)-Eu(2)-O(12)#3   | 93.75(14)  |
| O(7)#1-Eu(1)-O(3)#2  | 145.34(13) | O(15)-Eu(2)-O(12)#3   | 127.25(16) |
| O(1)-Eu(1)-O(3)#2    | 79.02(13)  | O(11)#3-Eu(2)-O(12)#3 | 53.17(13)  |
| O(4)#2-Eu(1)-O(3)#2  | 53.25(12)  | O(8)#1-Eu(2)-O(12)#3  | 145.82(15) |
| O(13)-Eu(1)-O(9)     | 147.44(16) | O(14)-Eu(2)-O(2)      | 79.41(19)  |
| O(5)-Eu(1)-O(9)      | 74.88(15)  | O(10)-Eu(2)-O(2)      | 120.81(13) |
| O(7)#1-Eu(1)-O(9)    | 79.76(14)  | O(15)-Eu(2)-O(2)      | 148.42(17) |
| O(1)-Eu(1)-O(9)      | 117.32(13) | O(11)#3-Eu(2)-O(2)    | 127.46(14) |
| O(4)#2-Eu(1)-O(9)    | 84.37(14)  | O(8)#1-Eu(2)-O(2)     | 74.24(17)  |
| O(3)#2-Eu(1)-O(9)    | 132.53(14) | O(12)#3-Eu(2)-O(2)    | 77.54(14)  |
| O(13)-Eu(1)-O(6)     | 78.50(15)  | O(14)-Eu(2)-O(1)      | 130.01(19) |
| O(5)-Eu(1)-O(6)      | 53.22(12)  | O(10)-Eu(2)-O(1)      | 68.85(12)  |
| O(7)#1-Eu(1)-O(6)    | 83.24(13)  | O(15)-Eu(2)-O(1)      | 141.61(15) |
| O(1)-Eu(1)-O(6)      | 151.32(12) | O(11)#3-Eu(2)-O(1)    | 122.50(14) |
| O(4)#2-Eu(1)-O(6)    | 128.74(13) | O(8)#1-Eu(2)-O(1)     | 98.04(16)  |
| O(3)#2-Eu(1)-O(6)    | 114.79(14) | O(12)#3-Eu(2)-O(1)    | 78.93(13)  |
| O(9)-Eu(1)-O(6)      | 73.09(14)  | O(2)-Eu(2)-O(1)       | 51.97(12)  |
| O(13)-Eu(1)-O(10)    | 140.54(14) | O(14)-Eu(2)-O(7)#1    | 127.05(16) |
| O(5)-Eu(1)-O(10)     | 118.57(14) | O(10)-Eu(2)-O(7)#1    | 67.97(12)  |
| O(7)#1-Eu(1)-O(10)   | 67.76(12)  | O(15)-Eu(2)-O(7)#1    | 78.76(15)  |
| O(1)-Eu(1)-O(10)     | 66.46(11)  | O(11)#3-Eu(2)-O(7)#1  | 143.09(13) |
| O(4)#2-Eu(1)-O(10)   | 71.73(12)  | O(8)#1-Eu(2)-O(7)#1   | 50.92(13)  |
| O(3)#2-Eu(1)-O(10)   | 119.04(12) | O(12)#3-Eu(2)-O(7)#1  | 146.69(13) |
| O(9)-Eu(1)-O(10)     | 51.00(12)  | O(2)-Eu(2)-O(7)#1     | 88.10(14)  |
| O(6)-Eu(1)-O(10)     | 119.60(13) | O(1)-Eu(2)-O(7)#1     | 68.66(12)  |
| Eu(1)-O(1)-Eu(2)     | 100.01(12) | Eu(2)-O(10)-Eu(1)     | 98.91(12)  |
| Eu(1)#1-O(7)-Eu(2)#1 | 96.55(12)  |                       |            |

**Symmetry transformations used to generate equivalent atoms:**

#1 -x+2, -y+1, -z+1; #2 -x+1, -y+1, -z+1; #3 -x+1, -y, -z+1

**Table S4.** The LOD calculation of **1**.

|                                                                              |                                                             |
|------------------------------------------------------------------------------|-------------------------------------------------------------|
| $K=1.8 \times 10^7$                                                          | The slope of the calibration curve (see Fig. 5 in the text) |
| $\sigma=0.451$                                                               | The standard deviation of the blank solution                |
| LOD = $3\sigma/K = 3 \times 0.451 / 1.8 \times 10^7 = 7.52 \times 10^{-8}$ M |                                                             |

**Table S5.** A comparison of LODs toward  $\text{Cr}^{3+}$  ion for some probes.

| Compound                                                                                       | method       | LOD                     | Sensing type | Working solvent                             | Reference |
|------------------------------------------------------------------------------------------------|--------------|-------------------------|--------------|---------------------------------------------|-----------|
| $\{\text{Zn}_2(\text{tpcb})_2(2,3\text{-ndc})_2\} \cdot \text{H}_2\text{O}\}_n$                | fluorescence | $1.69 \times 10^{-8}$ M | Turn off     | $\text{H}_2\text{O}$                        | 8         |
| $\{\text{Eu}(\text{HL}_1)(\text{H}_2\text{O})_3\} \cdot \text{H}_2\text{O}\}_n$                | fluorescence | $0.41 \times 10^{-6}$ M | Turn off     | $\text{H}_2\text{O}$                        | 9         |
| $\{\text{Zn}_2(\mu_3\text{-OH})(\text{cpta})(4,4'\text{-bipy})\} \cdot \text{H}_2\text{O}\}_n$ | fluorescence | $5.55 \times 10^{-6}$ M | Turn off     | $\text{H}_2\text{O}$                        | 10        |
| $[\text{Eu}_2(\text{tpbpc})_4 \cdot \text{CO}_3 \cdot \text{H}_2\text{O}] \cdot \text{DMF}$    | fluorescence | $7.00 \times 10^{-5}$ M | Turn off     | $\text{H}_2\text{O}$                        | 11        |
| $\text{Zn}_3(\text{bpdc})_2(\text{pdc})(\text{DMF}) \cdot 6\text{DMF}$                         | fluorescence | $2.51 \times 10^{-5}$ M | Turn off     | $\text{H}_2\text{O}$                        | 12        |
| $[\text{Eu}(\text{L}_2)(\text{HCOO})(\text{H}_2\text{O})]_n$                                   | fluorescence | $1.51 \times 10^{-6}$ M | Turn off     | $\text{H}_2\text{O}$                        | 13        |
| $[\text{Zn}(\text{L}_3)(\text{H}_2\text{O})] \cdot \text{H}_2\text{O}$                         | fluorescence | $2.44 \times 10^{-6}$ M | Turn off     | $\text{H}_2\text{O}$                        | 14        |
| $[\text{Zn}_2(\text{TPOM})(\text{NH}_2\text{-BDC})_2] \cdot 4\text{H}_2\text{O}$               | fluorescence | $1.88 \times 10^{-6}$ M | Turn on      | DMF                                         | 15        |
| $\{\text{Cd}_2(\text{adc})_2(4\text{-nvp})_6\} \cdot \text{MeOH} \cdot \text{H}_2\text{O}\}_n$ | fluorescence | $0.31 \times 10^{-6}$ M | Turn on      | $\text{CH}_3\text{CN} / \text{H}_2\text{O}$ | 16        |
| $[\text{Zn}(\text{tbda})]_n$                                                                   | fluorescence | $0.18 \times 10^{-3}$ M | Turn on      | $\text{H}_2\text{O}$                        | 17        |
| $[\text{Cd}_4(\text{NDC})_3(4\text{-Hptz})_2(\text{H}_2\text{O})_2] \cdot \text{H}_2\text{O}$  | fluorescence | $0.16 \times 10^{-6}$ M | Turn on      | $\text{H}_2\text{O}$                        | 18        |
| $\text{YF}_3 \cdot \text{Eu}^{3+}$ nanoparticles                                               | fluorescence | $1.88 \times 10^{-6}$ M | Turn off     | $\text{H}_2\text{O}$                        | 19        |
| Rh6G-AuNPs                                                                                     | fluorescence | $9.28 \times 10^{-6}$ M | Turn on      | $\text{H}_2\text{O}$                        | 20        |
| $\text{Eu}^{3+}(5\%)\text{-Gd}_2\text{O}_3$ nanoparticles                                      | fluorescence | $4.14 \times 10^{-5}$ M | Turn off     | $\text{H}_2\text{O}$                        | 21        |
| PVP@Gd <sub>2</sub> O <sub>3</sub> :Eu <sup>3+</sup> NPs                                       | fluorescence | $2.10 \times 10^{-6}$ M | Turn off     | $\text{H}_2\text{O}$                        | 22        |
| Cu NPs                                                                                         | fluorescence | $3.00 \times 10^{-8}$ M | Turn off     | MOPS buffer                                 | 23        |
| AO/AuNP                                                                                        | fluorescence | $2.00 \times 10^{-8}$ M | Turn on      | $\text{H}_2\text{O}$                        | 24        |
| (PIN/CdS) nanocomposite                                                                        | fluorescence | $4.70 \times 10^{-7}$ M | Turn on      | PBS buffer                                  | 25        |
| RB-PEG-PAA-MNPs                                                                                | fluorescence | $1.31 \times 10^{-7}$ M | Turn on      | $\text{MeOH}/\text{H}_2\text{O}$            | 26        |
| rhodamine-benzothiazole                                                                        | fluorescence | $0.36 \times 10^{-7}$ M | ratiometric  | $\text{MeOH}/\text{H}_2\text{O}$            | 27        |
| 2-((9H-fluoren-2-ylimino)methyl)phenol                                                         | fluorescence | $2.50 \times 10^{-7}$ M | Turn on      | $\text{CH}_3\text{CN}$                      | 28        |
| bissalamo-coumarin                                                                             | fluorescence | $4.87 \times 10^{-7}$ M | Turn off     | ethanol                                     | 29        |
| rhodamine 6G-en                                                                                | fluorescence | $0.31 \times 10^{-6}$ M | Turn on      | methanol/ $\text{H}_2\text{O}$              | 30        |
| orange emission carbon dots                                                                    | fluorescence | $0.38 \times 10^{-6}$ M | Turn off     | Tris-HCl buffer                             | 31        |
| S/N-CQDs                                                                                       | fluorescence | $6.00 \times 10^{-6}$ M | Turn off     | $\text{H}_2\text{O}$                        | 32        |
| $[\text{Eu}_2\text{L}_3(\text{DMF})_3] \cdot 2\text{DMF} \cdot 5\text{H}_2\text{O}$            | fluorescence | $7.52 \times 10^{-8}$ M | Recovery     | $\text{H}_2\text{O}$                        | This work |

**Table S6.** Assay results for  $\text{Cr}^{3+}$  detection in real samples (n = 3).

| Sample    | $\text{Cr}^{3+}$ found ( $\mu\text{M}$ ) | added $\text{Cr}^{3+}$ ( $\mu\text{M}$ ) | found $\text{Cr}^{3+}$ ( $\mu\text{M}$ ) | Recovery (%) | RSD (%) |
|-----------|------------------------------------------|------------------------------------------|------------------------------------------|--------------|---------|
| tap water | NOT found                                | 100                                      | 95.88                                    | 95.88%       | 1.61%   |
|           |                                          | 200                                      | 196.87                                   | 98.43%       | 1.19%   |

|           |           |     |        |        |       |
|-----------|-----------|-----|--------|--------|-------|
|           |           | 300 | 295.79 | 98.60% | 1.02% |
| sea water | NOT found | 100 | 97.81  | 97.81% | 1.64% |
|           |           | 200 | 196.18 | 98.09% | 1.11% |
|           |           | 300 | 295.84 | 98.61% | 1.02% |



### Supporting Figures

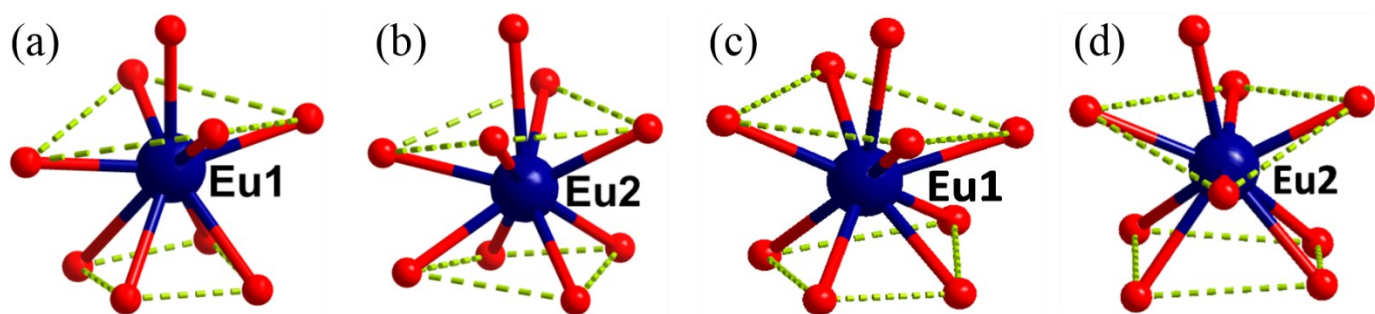

**Figure. S1** Coordination polyhedra of Eu1 (a) and Eu2 (b) in **1**. Coordination polyhedra of Eu1 (c) and Eu2 (d) in  $\text{Cr}(\text{NO}_3)_3@1'$ .

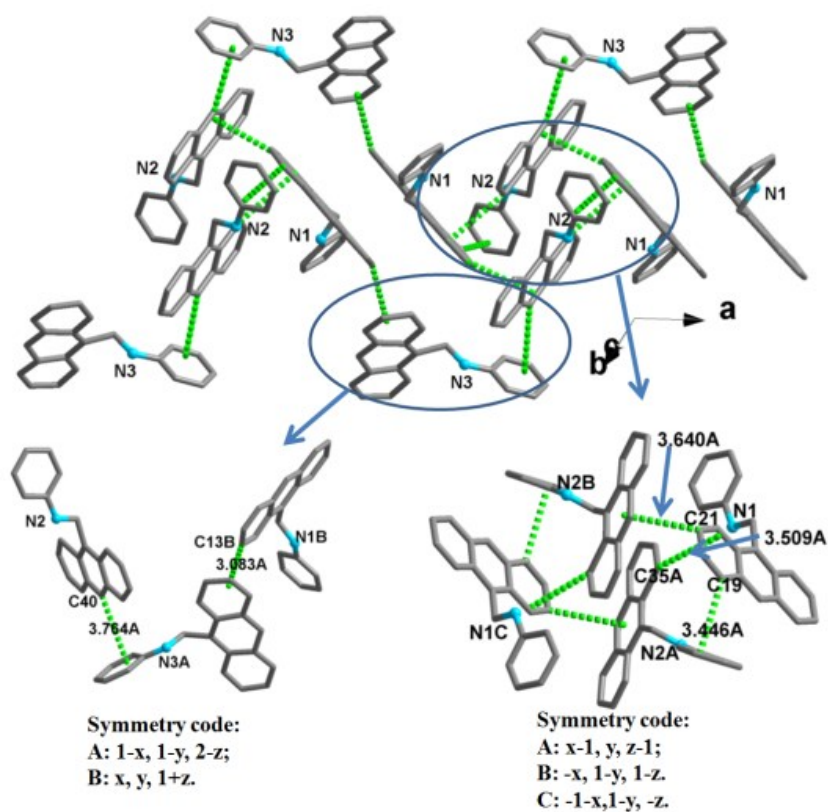

**Figure. S2** The  $\pi$ - $\pi$  interactions (represented as green dotted line) in the packing structure of **1**.

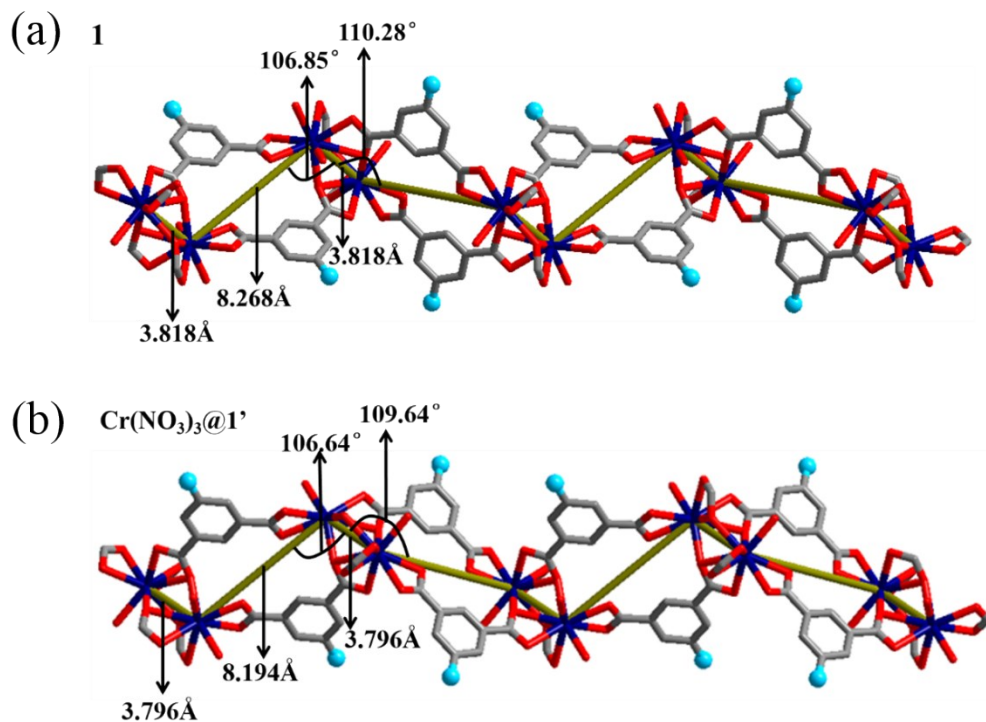

**Figure. S3** A comparison of the skeleton of the 2D net in **1** (a) and  $\text{Cr}(\text{NO}_3)_3@1'$  (b) to show that the introduction of  $\text{Cr}^{3+}$  ions cause deformation of the framework. Both of them are viewed along the  $c$  direction. The 9-anthrylmethyl groups are omitted for clarity.

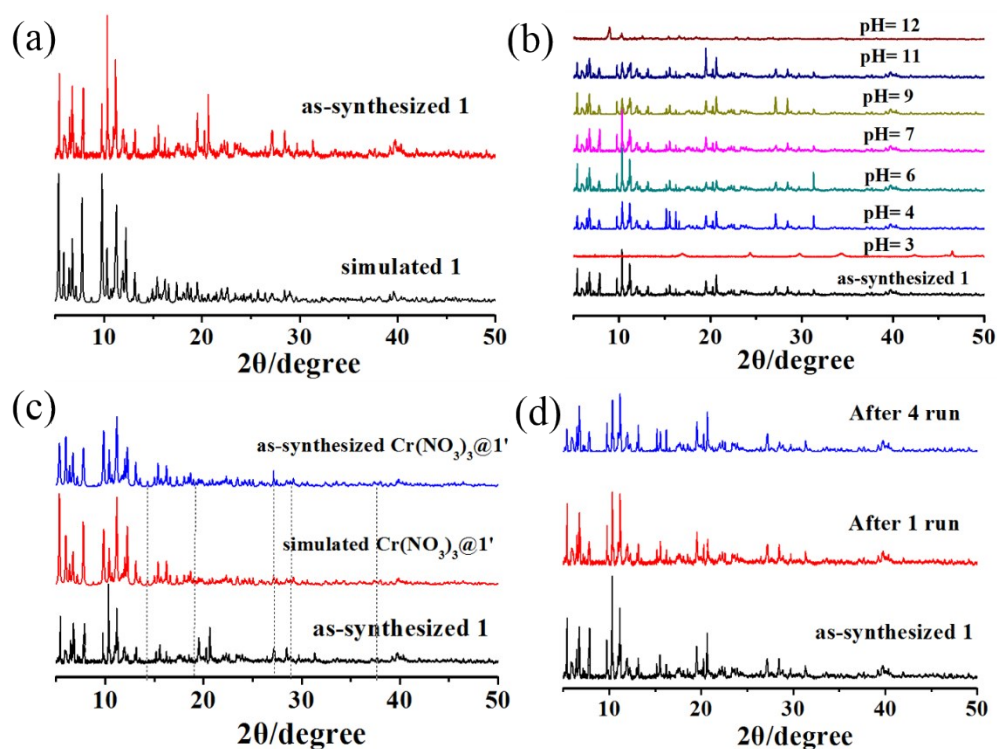

**Figure. S4** (a) PXRD patterns of simulated **1** (black) and as-synthesized **1** (red). (b) A comparison of PXRD patterns of as-synthesized **1** and the samples of **1** after being soaked in aqueous solutions with pH in the range of 3-12 for 24 hrs. (c) PXRD patterns of as-synthesized **1** (black), simulated  $\text{Cr}(\text{NO}_3)_3@1'$  (red) and as-synthesized  $\text{Cr}(\text{NO}_3)_3@1'$  (blue). (d) The results of PXRD of **1** before and after four cycles of the detection of  $\text{Cr}^{3+}$  ion.

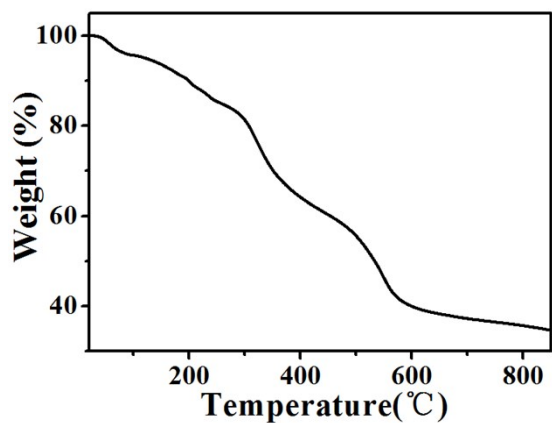

**Figure. S5** The TGA curve of **1** in a  $N_2$  flow from 25 °C to 850 °C.

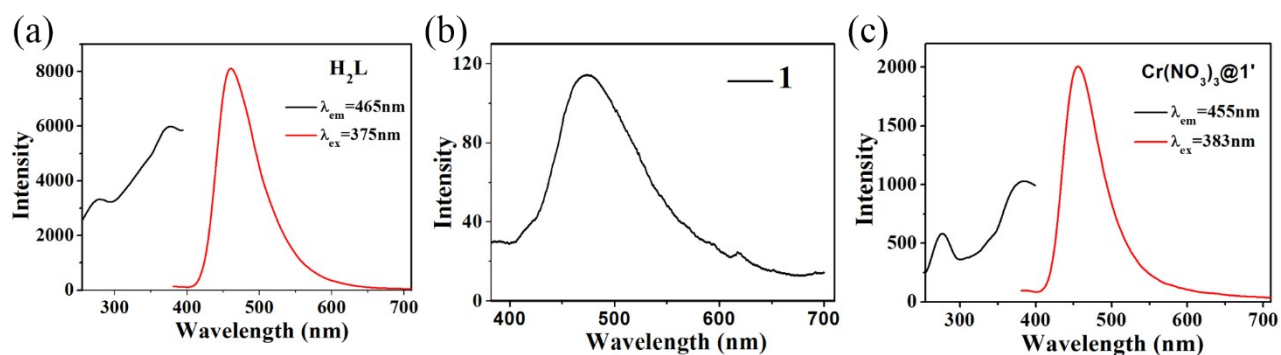

**Figure. S6** (a) Solid state excitation and emission spectra of free  $H_2L$  ligand. (b) and (c) are the solid-state photoluminescence spectra of **1** and  $Cr(NO_3)_3@1'$  at room temperature.

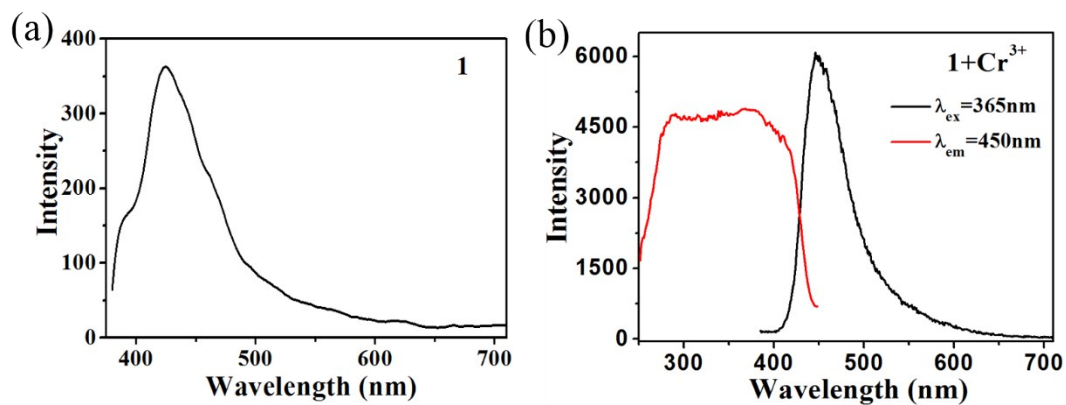

**Figure. S7** (a) Emission spectrum of suspension of **1** in  $H_2O$ . (b) The excitation and emission spectra of suspension of **1** dispersed in  $1.0 \times 10^{-3}$  M  $Cr^{3+}$  solution.

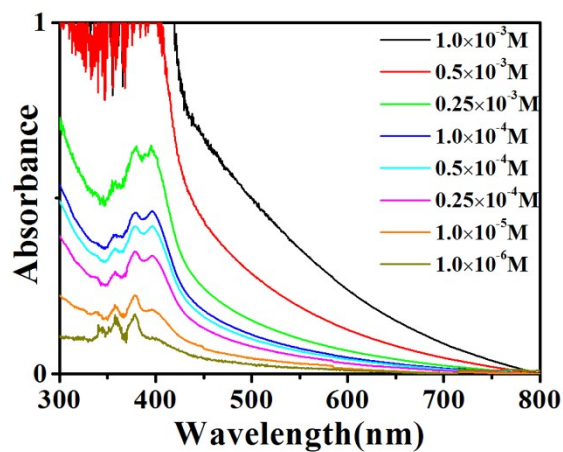

Figure. S8 UV-Vis spectra of different concentrations of H<sub>2</sub>L in H<sub>2</sub>O.

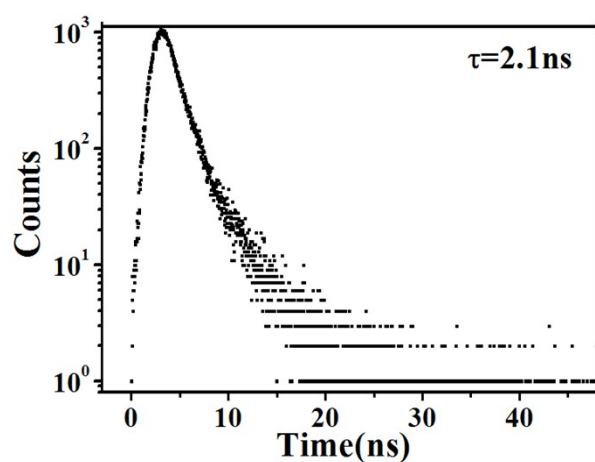

Figure. S9 Luminescence decay curve of Cr(NO<sub>3</sub>)<sub>3</sub>@1' ( $\lambda_{\text{ex}}$ =380 nm).

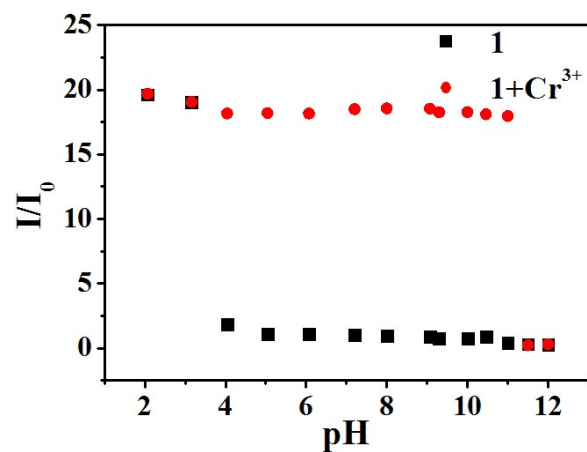

Figure. S10 Luminescence response at 425 nm for suspension of **1** (black square) and at 450 nm for suspension of **1** dispersed in  $1.0 \times 10^{-3}$  M Cr<sup>3+</sup> solution (red circle) as a function of pH in H<sub>2</sub>O. The pH was adjusted by 1 M aqueous solutions of HCl or NaOH.  $\lambda_{\text{ex}}$ =365 nm.

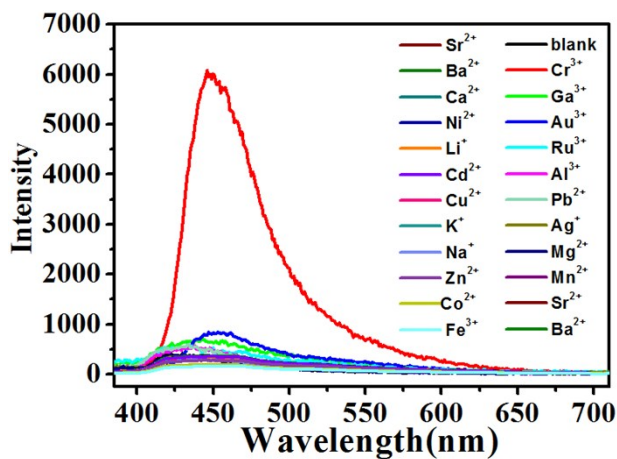

**Figure. S11** Emission spectra ( $\lambda_{\text{ex}}=365$  nm) of suspension of **1** dispersed in  $1.0 \times 10^{-3}$  M aqueous solution of different metal ions.

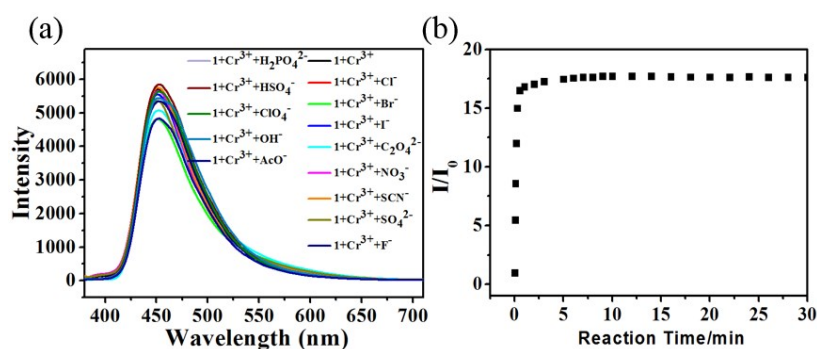

**Figure. S12** (a) Luminescence response of suspension of **1** dispersed in  $1.0 \times 10^{-3}$  M  $\text{Cr}^{3+}$  solution and  $1.0 \times 10^{-3}$  M of various potassium salts in aqueous solution ( $\lambda_{\text{ex}}=365$  nm). (b) Luminescence intensity of suspension of **1** as a function of immersion time when  $1.0 \times 10^{-3}$  M  $\text{Cr}^{3+}$  aqueous solution was added.

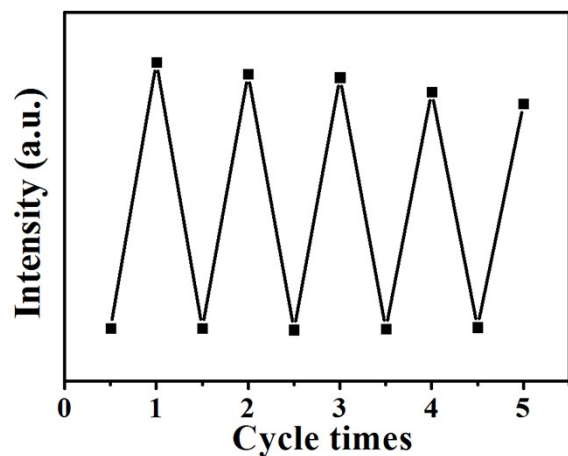

**Figure. S13** The results of emission intensities of suspension of **1** before and after the detection of  $\text{Cr}^{3+}$  ion for five continuous cycles.

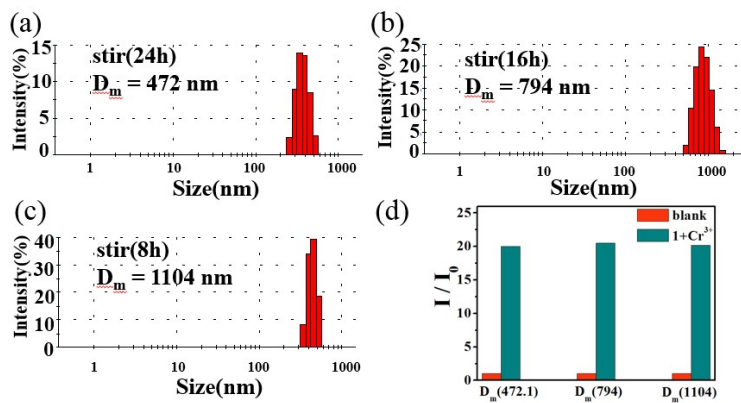

**Figure. S14** Dynamic light scattering (DLS) of probe **1** at different stirring times(a: stir 8h,b: stir 16h,c: stir 24h). (d) Luminescence response of suspension of **1** with different particle sizes dispersed in  $1.0 \times 10^{-3} \text{ M Cr}^{3+}$  solution.

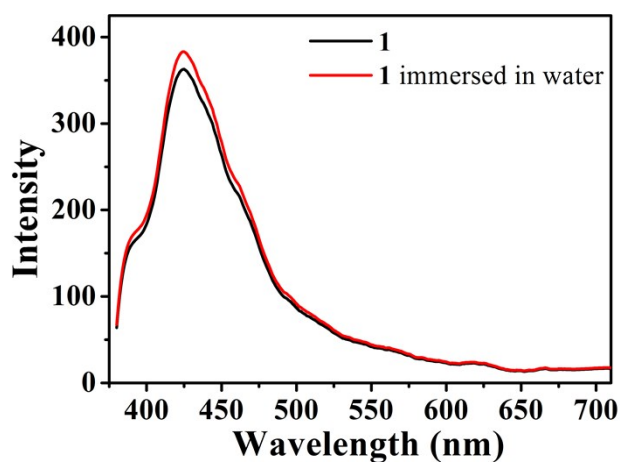

**Figure. S15** A comparison of emission spectra of suspensions of freshly prepared **1** in aqueous solution and **1** after being immersed in water for 2 months.

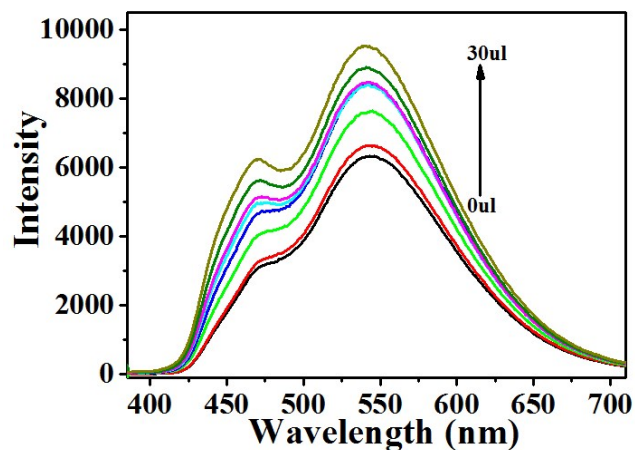

**Figure. S16** The emission spectra of  $\text{H}_2\text{L}$  ( $1.34 \times 10^{-3} \text{ M}$ ) in  $\text{H}_2\text{O}$  upon an incremental addition of  $0.1 \text{ M Cr}^{3+}$  solution.

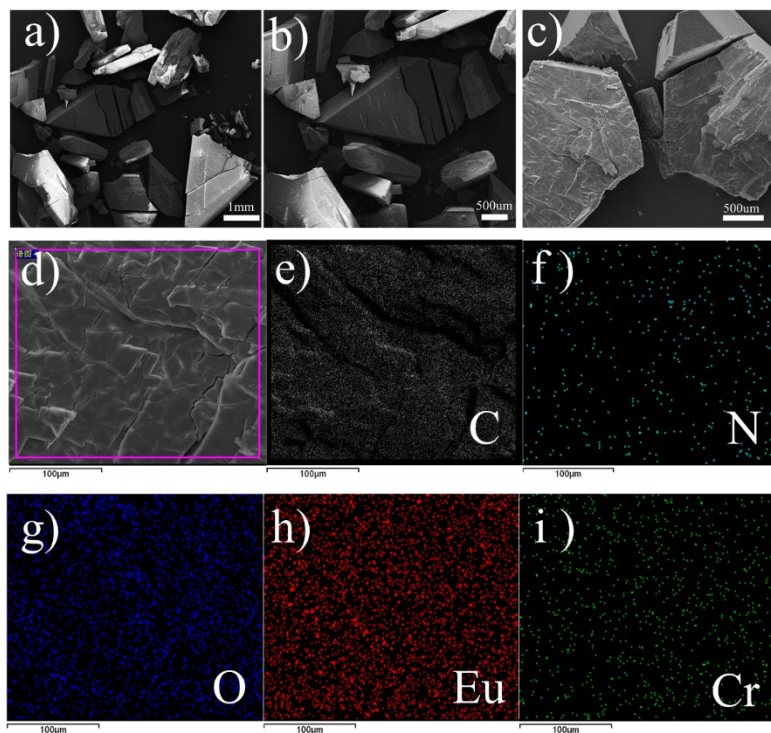

**Figure. 17** SEM images of **1** (a),  $\text{Cr}(\text{NO}_3)_3@1'$  (b). (c) A view of the cross sections of  $\text{Cr}(\text{NO}_3)_3@1'$ . (d) Original image of TEM elemental mapping of  $\text{Cr}(\text{NO}_3)_3@1'$ . (e-i) TEM elemental mapping of C (gray), N (sky blue), O (blue), Eu (red) and Cr (green) of  $\text{Cr}(\text{NO}_3)_3@1'$ , respectively.

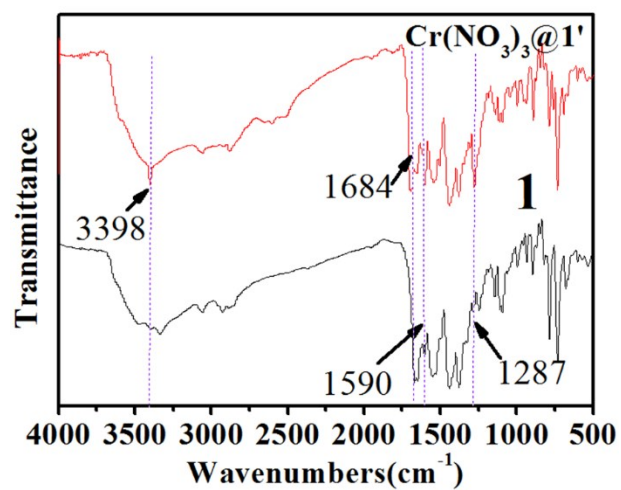

**Figure. S18** A comparison of IR spectra of **1** and  $\text{Cr}(\text{NO}_3)_3@1'$ .

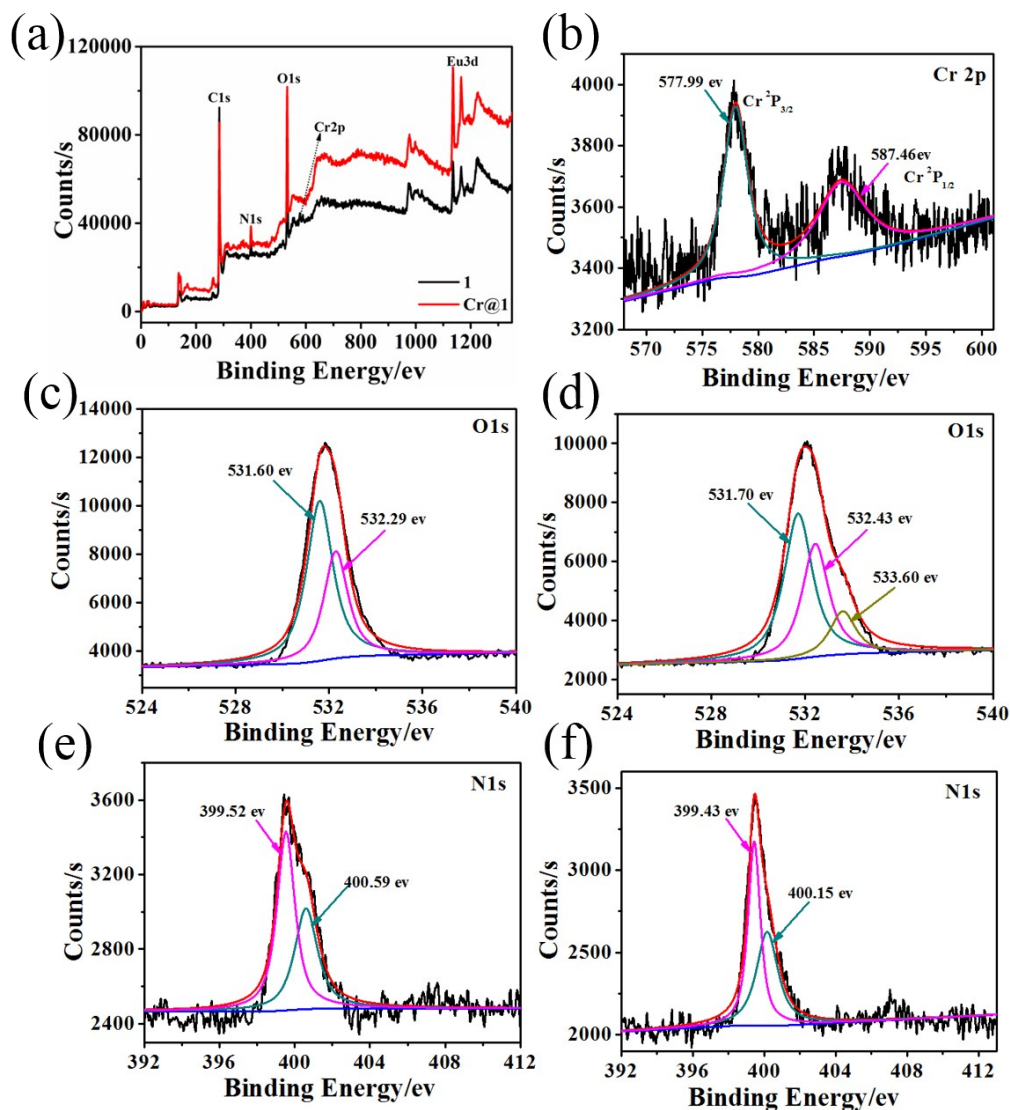

**Figure. S19** A comparison of XPS spectra of **1** and  $\text{Cr}(\text{NO}_3)_3@1$ . (a) Overall spectra of **1** and  $\text{Cr}(\text{NO}_3)_3@1$ . (b) Cr core-level spectrum of  $\text{Cr}(\text{NO}_3)_3@1$ . (c) O 1s core-level spectrum of **1**; (d) O 1s core-level spectrum of  $\text{Cr}(\text{NO}_3)_3@1$ ; (e) N 1s core-level spectrum of **1**; (f) N 1s core-level spectrum of  $\text{Cr}(\text{NO}_3)_3@1$ .

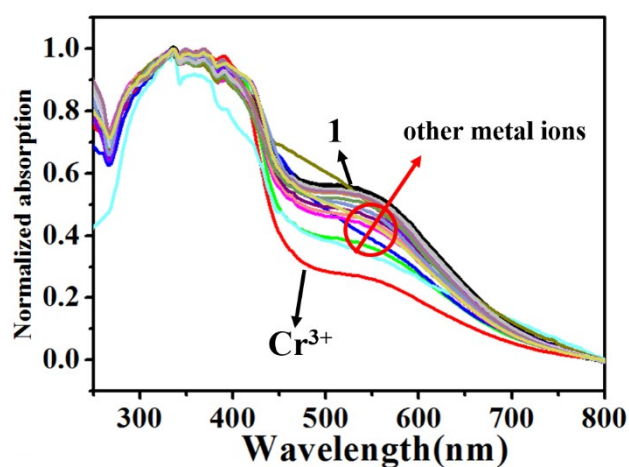

**Figure. S20** The UV-Vis diffuse reflectance spectra of **1** (black line), **1** soaked in  $\text{Cr}^{3+}$  (red line) and other metal ions ( $\text{Al}^{3+}$ ,  $\text{Pb}^{2+}$ ,  $\text{Mg}^{2+}$ ,  $\text{Mn}^{2+}$ ,  $\text{Sr}^{2+}$ ,  $\text{Ba}^{2+}$ ,  $\text{Ca}^{2+}$ ,  $\text{Ni}^{2+}$ ,  $\text{Li}^+$ ,  $\text{Cd}^{2+}$ ,  $\text{Cu}^{2+}$ ,  $\text{K}^+$ ,  $\text{Na}^+$ ,  $\text{Zn}^{2+}$ ,  $\text{Co}^{2+}$ ,  $\text{Fe}^{3+}$ ,  $\text{Au}^{3+}$ ,  $\text{Ga}^{3+}$ ,  $\text{Ru}^{3+}$ ,  $\text{Ag}^+$ ).



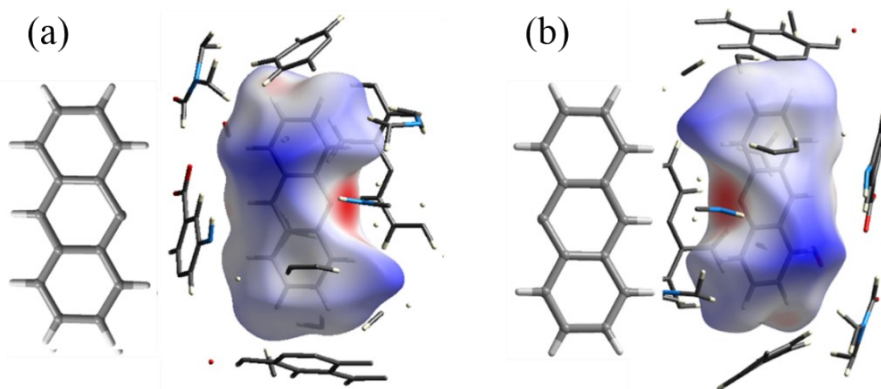

**Figure. S21** The Hirshfeld  $d_{\text{norm}}$  surfaces of the anthracene ring in **1** (a) and  $\text{Cr}(\text{NO}_3)_3@1'$  (b).

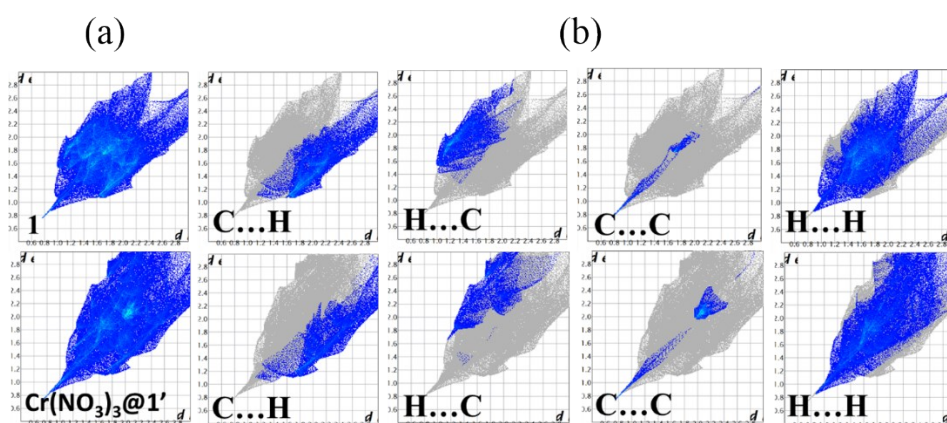

**Figure. S22** The fingerprint plots of intermolecular interactions for anthracene ring in **1** and  $\text{Cr}(\text{NO}_3)_3@1'$ . (a) is the general graph, (b) is the sub-graph of various weak interaction.

### Supporting references

1. R. Singh, J. Mrozinski and P. K. Bharadwaj, *Cryst. Growth Des.*, 2014, **14**, 3623-3633.
2. G. M. Sheldrick, *Acta Cryst.*, 2015, **71**, 3-8.
3. A. L. P. Spek, Multipurpose Crystallographic Tool, Utrecht University, Utrecht, The Netherlands, 2008.
4. M. A. Spackman and D. Jayatilaka, *CrystEngComm*, 2009, **11**, 19-32.
5. R. Arulraj, S. Sivakumar, K. Rajkumar, J. P. Jasinski, M. Kaur and A. Thiruvalluvar, *J. Chem. Crystallogr.*, 2019, **50**, 41-51.
6. M. J. Turner MJ, Wolff SK, Grimwood DJ, Spackman, J. D. PR, Spackman MA (2017) CrystalExplorer 17.5, and [h. h. n.](http://h.h.n.universityofwesternaustralia.edu.au) University of Western Australia.
7. M. A. Spackman and J. J. McKinnon, *CrystEngComm.*, 2002, **4**, 378-392.
8. T. Y. Gu, M. Dai, D. J. Young, Z. G. Ren and J. P. Lang, *Inorg. Chem.*, 2017, **56**, 4669-4679.
9. H. Wang, J. Qin, C. Huang, Y. Han, W. Xu and H. Hou, *Dalton Trans.*, 2016, **45**, 12710-12716.
10. H. Jin, J. Xu, L. Zhang, B. Ma, X. Shi, Y. Fan and L. Wang, *J. Solid State Chem.*, 2018, **268**, 168-174.
11. J. Liu, G. Ji, J. Xiao and Z. Liu, *Inorg. Chem.*, 2017, **56**, 4197-4205.
12. X. Meng, M. J. Wei, H. N. Wang, H. Y. Zang and Z. Y. Zhou, *Dalton Trans.*, 2018, **47**, 1383-1387.
13. Z. Sun, M. Yang, Y. Ma and L. Li, *Cryst. Growth Des.*, 2017, **17**, 4326-4335.

14. X.-Y. Guo, F. Zhao, J.-J. Liu, Z.-L. Liu and Y.-Q. Wang, *J. Mater. Chem. A*, 2017, **5**, 20035-20043.
15. R. Lv, J. Wang, Y. Zhang, H. Li, L. Yang, S. Liao, W. Gu and X. Liu, *J. Mater. Chem. A*, 2016, **4**, 15494-15500.
16. B. Dutta, R. Jana, A. K. Bhanja, P. P. Ray, C. Sinha and M. H. Mir, *Inorg. Chem.*, 2019, **58**, 2686-2694.
17. X. Liang, Y. Jia, Z. Zhan and M. Hu, *Appl. Organomet. Chem.*, 2019, **33**.
18. H. Li, D. Li, B. Qin, W. Li, H. Zheng, X. Zhang and J. Zhang, *Dyes Pigm.*, 2020, **178**.
19. L. Li, F.-F. Chen, J. Pan, S. Zhong, L. Li and Y. Yu, *J. Lumin.*, 2020, **226**.
20. N. Manjubaashini, T. Daniel Thangadurai, G. Bharathi and D. Nataraj, *J. Lumin.*, 2018, **202**, 282-288.
21. S. Chaudhary, S. Kumar, A. Umar, J. Singh, M. Rawat and S. K. Mehta, *Sensors and Actuators B: Chemical*, 2017, **243**, 579-588.
22. N. Vashistha, A. Chandra and M. Singh, *New J. Chem.*, 2020, **44**, 14211-14227.
23. C. Chen, F. Geng, Y. Wang, H. Yu, L. Li, S. Yang, J. Liu and W. Huang, *Talanta*, 2019, **205**, 120132.
24. L. Wang, J. Liu, Z. Zhou, M. Xu and B. Wang, *Analytical Methods*, 2017, **9**, 1786-1791.
25. M. Faraz, A. Abbasi, F. K. Naqvi, N. Khare, R. Prasad, I. Barman and R. Pandey, *Sensors and Actuators B: Chemical*, 2018, **269**, 195-202.
26. J. Wu, W. Jiang, S. Xu, Y. Wang and R. Tian, *Sensors and Actuators B: Chemical*, 2015, **211**, 33-41.
27. Y. Yang, Y. Feng, Y.-Z. Wang, F.-Z. Qiu, X.-L. Tang, G.-L. Zhang and W.-S. Liu, *Sensors and Actuators B: Chemical*, 2017, **253**, 1055-1062.
28. M. Tajbakhsh, G. B. Chalmardi, A. Bekhradnia, R. Hosseinzadeh, N. Hasani and M. A. Amiri, *Spectrochim Acta A Mol Biomol Spectrosc*, 2018, **189**, 22-31.
29. P. Zhang, X. Xu, Y.-F. Cui, X.-H. Wei, S.-J. meng and Y.-X. Sun, *Journal of Photochemistry and Photobiology A: Chemistry*, 2021, **408**.
30. R. Alam, R. Bhowmick, A. S. M. Islam, A. katarkar, K. Chaudhuri and M. Ali, *New J. Chem.*, 2017, **41**, 8359-8369.
31. J. Si, H. Wang, B. Wu, G. Wang, J. Yang, Z. Huo, T. Tian, X. Zhao and S. Han, *Micro & Nano Letters*, 2020, **16**, 58-63.
32. C. Wang, J. Xu, H. Li and W. Zhao, *Luminescence*, 2020, **35**, 1373-1383.
